# Supplementary material for: The LIM-Only Protein FHL2 Reduces Vascular Lesion Formation Involving Inhibition of Proliferation and Migration of Smooth Muscle Cells
Source: PubMed Central journal article supplement (PMC3988136; doi:10.1371/journal.pone.0094931), 2014-04-15

Figure S1

**A**

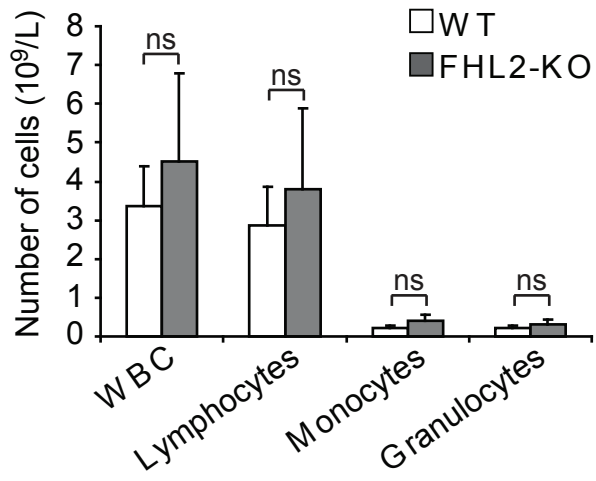

**B**

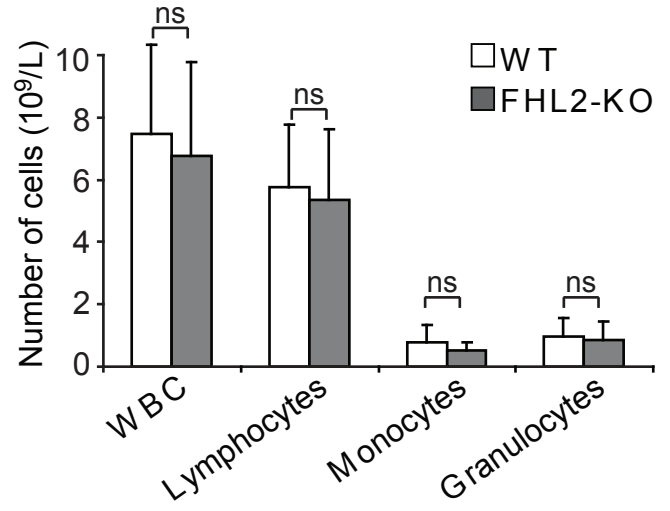

Supplement: pone.0094931.s001.pdf [file pone.0094931.s001.pdf]
